# Supplementary material
Source: PubMed Central journal article supplement (PMC3440214)
Supplement: supp_pp.112.201699_201699Supp_figures.pdf [file supp_pp.112.201699_201699Supp_figures.pdf]

**Supplemental Table S1.** *Microsomal fraction proteins pulled down by chitin magnetic beads.*

| AGI code  | Protein name                                                            | MW (kDa) | No. of Peptides |
|-----------|-------------------------------------------------------------------------|----------|-----------------|
| At3g21630 | LysM RLK1 (LYK1)                                                        | 67       | 16              |
| At2g33580 | LysM RLK5 (LYK5)                                                        | 73       | 13              |
| At2g23770 | LysM RLK4 (LYK4)                                                        | 67       | 8               |
| At2g17120 | CEBiP-like protein 1                                                    | 38       | 8               |
| At1g07660 | Histone superfamily protein                                             | 11       | 8               |
| AtCg00120 | ATPase alpha subunit (in the thylakoid membrane of the chloroplast)     | 55       | 7               |
| At5g28540 | Luminal binding protein BiP, an ER-localized member of the HSP70 family | 74       | 6               |
| At4g40030 | Histone superfamily protein                                             | 15       | 4               |
| At3g08580 | Mitochondrial ADP/ATP carrier                                           | 41       | 3               |
| At5g12250 | Beta-tubulin                                                            | 51       | 3               |
| At5g08670 | Mitochondrial ATP synthase beta-subunit                                 | 60       | 2               |
| At2g37620 | A member of the actin family                                            | 42       | 2               |

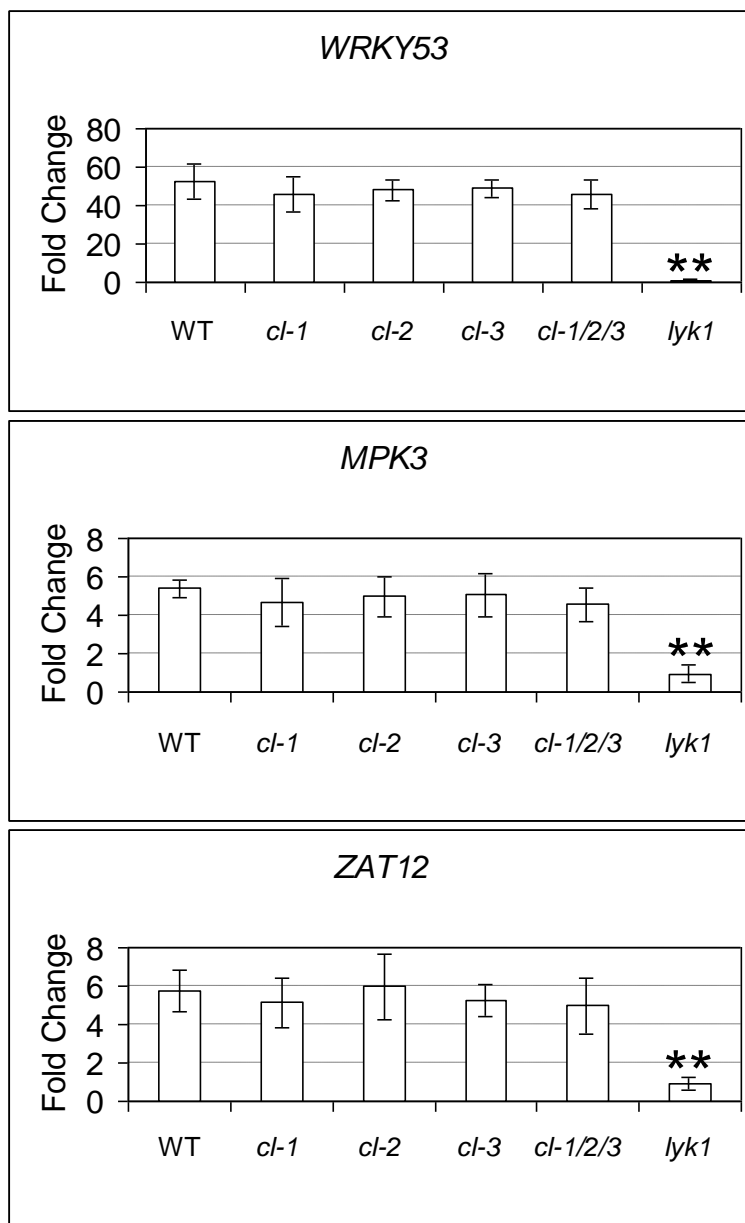

**Supplemental Fig. S1.** Analysis of chitin-responsive genes in the *CEBiP-like* mutants. Seedlings were treated with the purified chitin oligomer chitooctase at a final concentration of 1  $\mu$ M for 30 minutes, and then subjected to qRT-PCR analysis. The relative fold change ( $\pm$ SE) of the chitin-responsive genes (*WRKY53*, *MPK3*, and *ZAT12*) in a particular genotype was obtained from the comparison between the chitin-treated plants and the mock-treated plants after normalization with the reference gene, *SAND*. WT, wild-type plants; *cl-1*, *CEBiP-like-1* mutant; *cl-2*, *CEBiP-like-2* mutant; *cl-3*, *CEBiP-like-3* mutant; *cl-1/2/3*, a triple mutant of *CEBiP-like-1*, 2, and 3. Asterisks indicate statistically significant differences with respect to WT (\*\* $P < 0.01$ ).

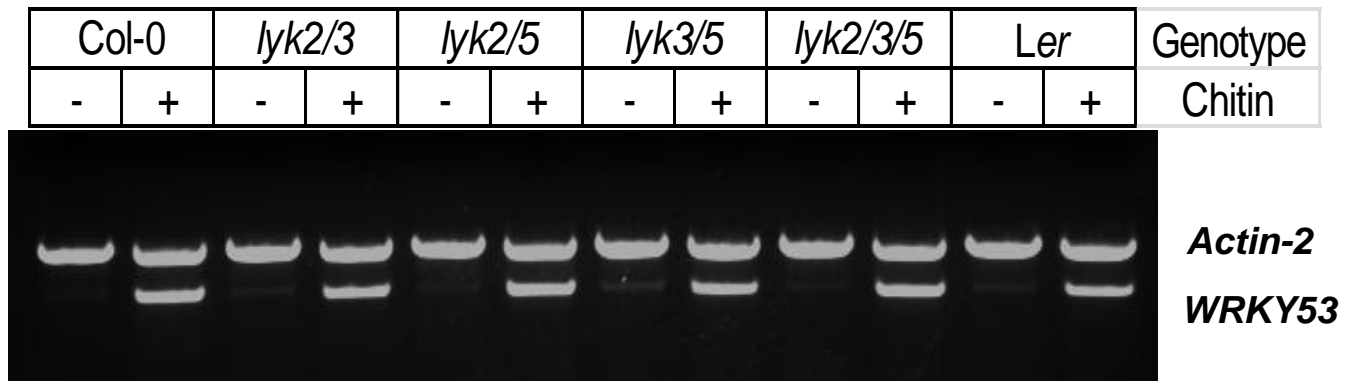

**Supplemental Fig. S2.** Induction of *WRKY53* by chitin is not blocked in the mutants of the *LYK2*, *LYK3*, and *LYK5* genes. Seedlings were treated with (+) or without (-) the purified chitin oligomer chitooctaose at a final concentration of 1  $\mu$ M for 30 minutes, then subjected to semi-quantitative RT-PCR analysis. *Actin-2* was included as an internal control. Col-0 and Ler, wild type plants; *lyk2/3*, double mutant of *lyk2* and *lyk3*; *lyk2/5*, double mutant of *lyk3* and *lyk5*; *lyk2/3/5*, triple mutant of *lyk2*, 3, and 5.

## Aerial tissues

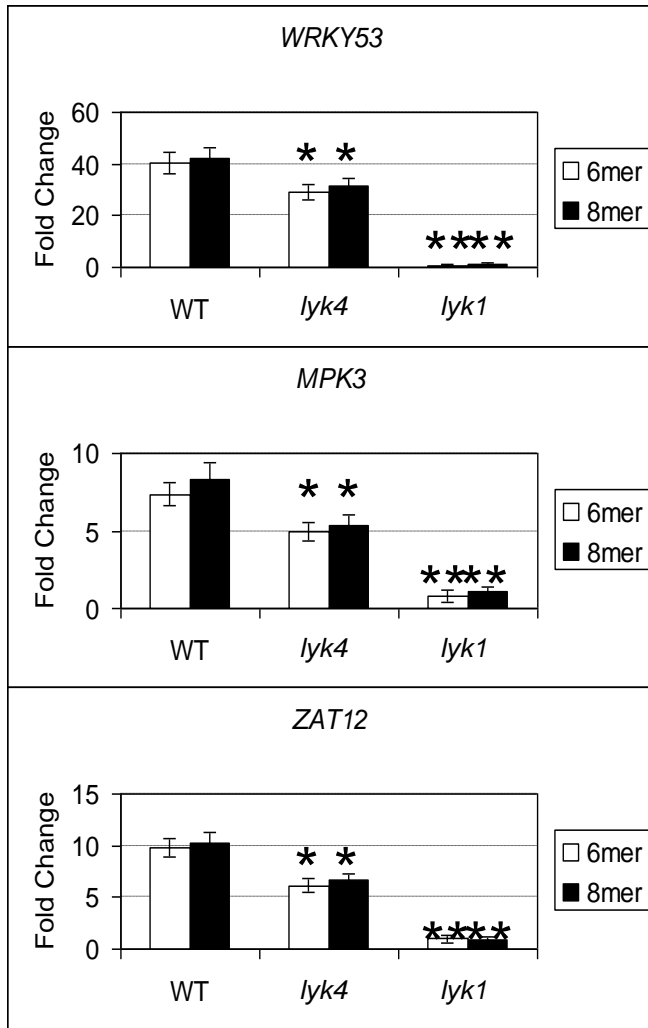

## Root tissues

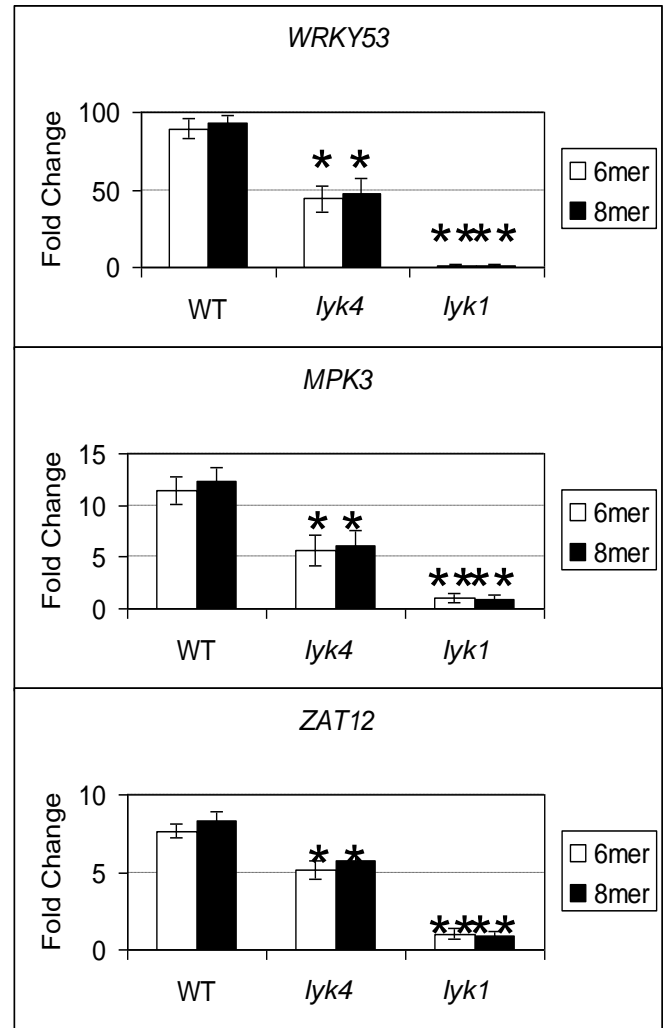

**Supplemental Fig. S3.** Expression levels of chitin-responsive genes in the aerial tissue or root tissues of *lyk4* mutant seedlings. Seedlings of *lyk4* and *lyk1* mutants were treated with the purified chitin oligomers, chitohexaose (6mer) and chitooctaose (8mer), at a final concentration of 1  $\mu$ M for 30 minutes, respectively, and then the aerial and root tissues were harvested separately for qRT-PCR analysis. The relative fold change ( $\pm$ SE) of chitin-responsive genes (*WRKY53*, *MPK3*, and *ZAT12*) in a particular genotype was obtained from the comparison between the chitin-treated plants and the mock-treated plants after normalization with the reference gene, *SAND*. Asterisks indicate statistically significant differences with respect to WT (\*P < 0.05, \*\*P < 0.01).

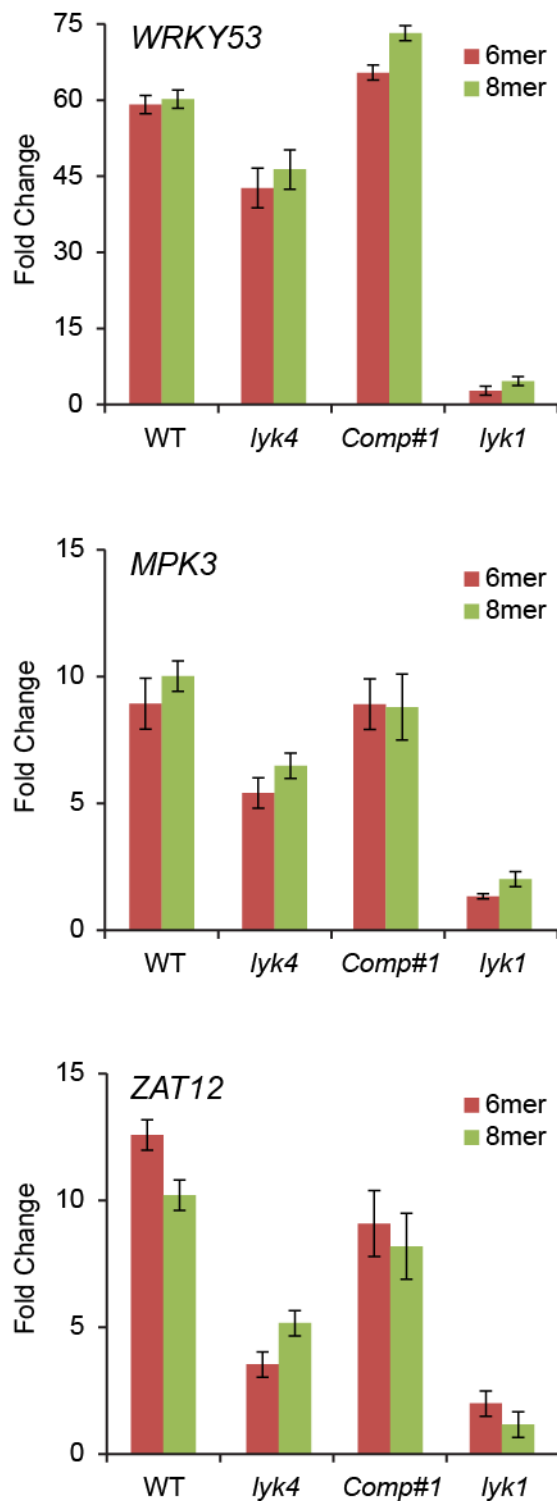

**Supplemental Fig. S4.** Analysis of chitin-responsive genes in complemented lines of the *lyk4* mutant. Seedlings (wild type, *lyk4*, 35S::LYK4 in *lyk4*, or *lyk1*) were treated with the purified chitin oligomer, chitohexaose (6mer) and chitooctaose (8mer), at a final concentration of 1  $\mu$ M for 30 minutes, and then subjected to qRT-PCR analysis. The relative fold change ( $\pm$ SE) of the chitin-responsive genes (*WRKY53*, *MPK3*, and *ZAT12*) in a particular genotype was obtained from the comparison between the chitin-treated plants and the mock-treated plants after normalization with the reference gene, *SAND*.

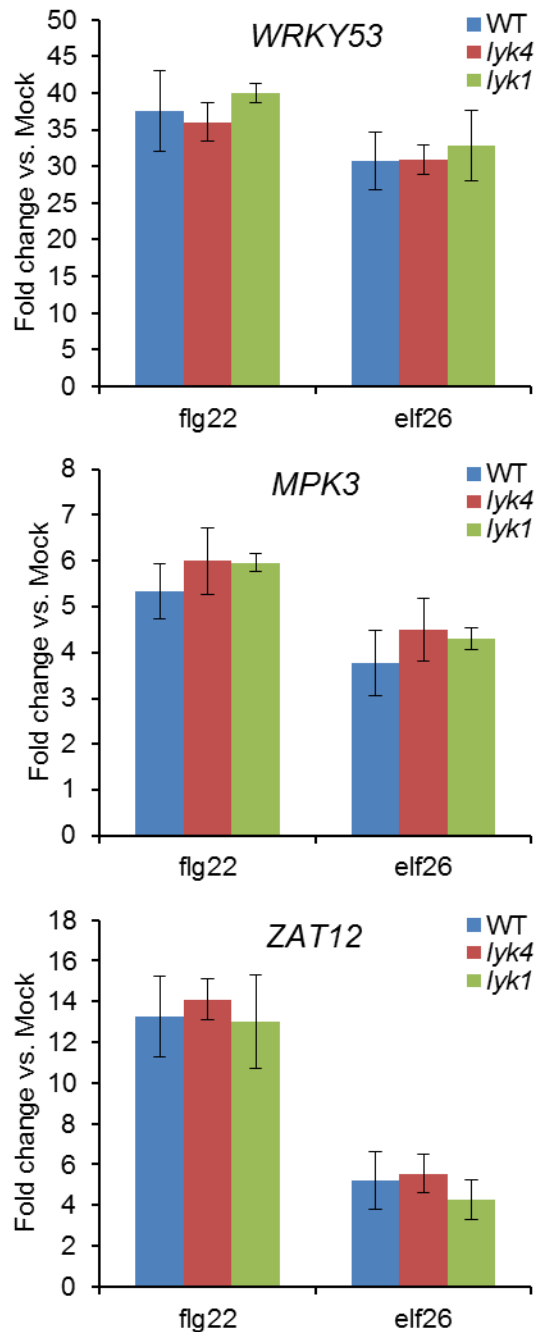

**Supplemental Fig. S5.** Analysis of flg22- or elf26-induced gene expressions in the *lyk4* and *lyk1* mutants. Seedlings were treated with flg22 or elf26 at a final concentration of 1  $\mu$ M for 30 minutes, and then subjected to qRT-PCR analysis. The relative fold change ( $\pm$ SE) of a target gene in a particular genotype was obtained using qRT-PCR with the comparison between the MAMP-treated plants and the mock-treated plants after normalization with the reference gene *SAND*.

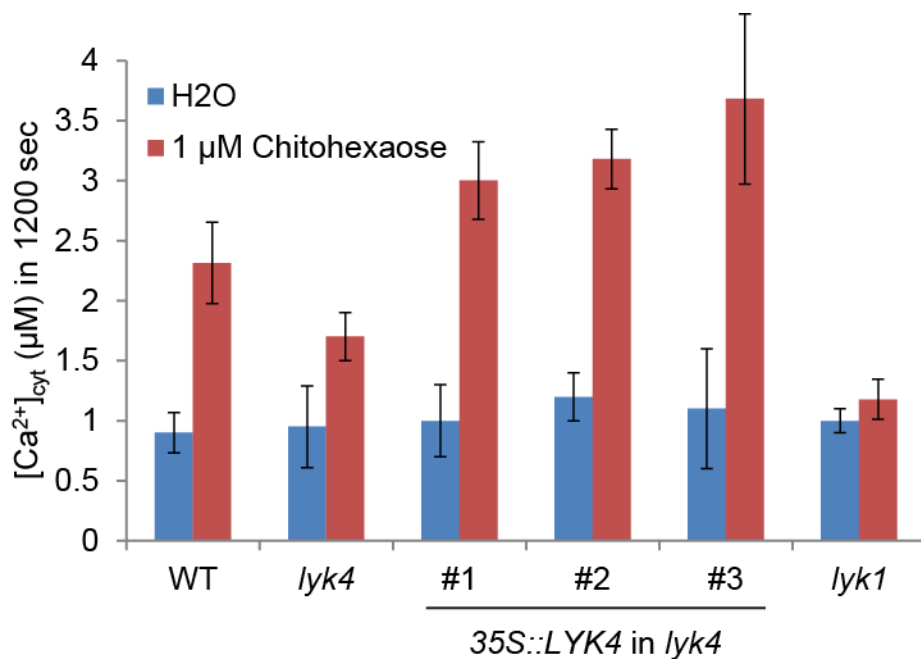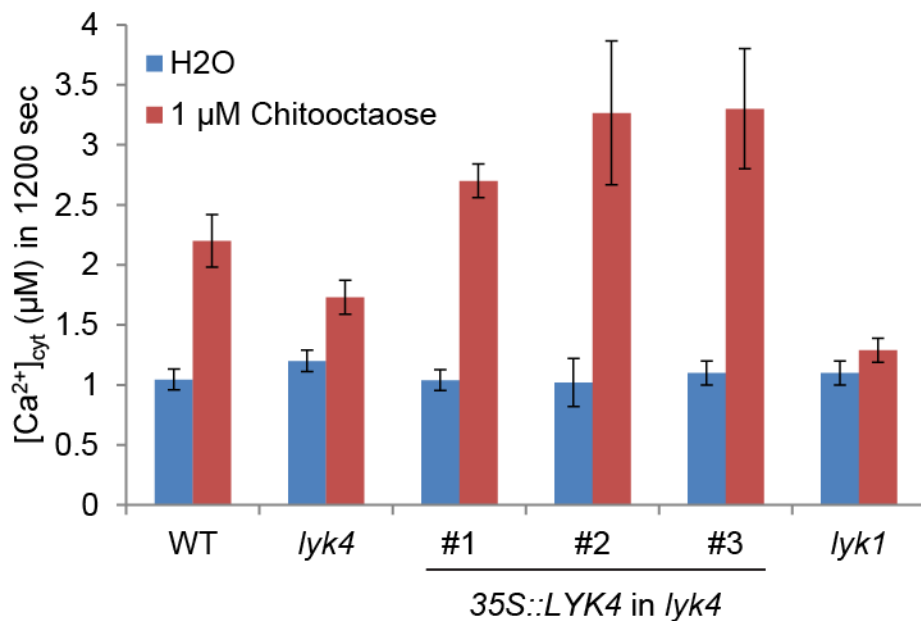

**Supplemental Fig. S6.** Effects of chitin treatments on the  $[Ca^{2+}]_{cyt}$  response in complemented lines of the *lyk4* mutant. Five-day-old seedlings were treated with 1  $\mu$ M of the purified chitin chitohexaose or chitooctaose, or H<sub>2</sub>O as a negative control. Histogram represents integrated  $[Ca^{2+}]_{cyt}$  values over 1200 sec after chitin treatment. Each value shows a mean of 6 seedlings with SE.

|                                                                          |                                                                 |     |
|--------------------------------------------------------------------------|-----------------------------------------------------------------|-----|
| PKA-Ca                                                                   | -----FERI                                                       | 4   |
| CaMK1                                                                    | -----MLGAVEGPRWKQAEDIRDIYDFR                                    | 23  |
| L4                                                                       | -CLSKKTKTKTQTQEE TGNLDSFMGKKPPMSDQE-----FDPLDGLSGMVVESLKVKYKFHE | 54  |
| L1                                                                       | YAYRKNKSKGDSFSSSIPLSTKADHASSTSLQSGGLGGAGVSPGIAAISVDKSVEFSLEE    | 60  |
| <div> <div>I</div> <div>II</div> <div>III</div> </div>                   |                                                                 |     |
| PKA-Ca                                                                   | KTLGTGSFGRVMLVKHKE TGNHYAMKILDKQKVVKLKQIEHTLN---EKRILQAVNFPFL   | 61  |
| CaMK1                                                                    | DVLGTGAFSEVILAE DKRTQKLVAIKCIAKEALE--GKEGSMEN---EIAVLHKIKHPNI   | 78  |
| L4                                                                       | LQSATSDFTSSSSIG----GSGYIGKINGDGAMIKKIEGNAS---EEVNLLSKLNHLNI     | 106 |
| L1                                                                       | LAKATDNFNLSFKIGQGGFGAVYYAELRGEKAAIKKMDMEASKQFLAELKVLTRVHHVNL    | 120 |
| <div> <div>IV</div> <div>V</div> <div>Vla</div> </div>                   |                                                                 |     |
| PKA-Ca                                                                   | VRLEFSFKDN SNLYMVMEYVPGGEMFSLRRIGRFSEPHAR--FYAAQIVLTFEYLHSLD    | 119 |
| CaMK1                                                                    | VALDDIYESGGHLYLIMQLVSGGELFDRIVEKGFYTERDAS--RLIFQVLDVAVKYLHDLG   | 136 |
| L4                                                                       | IRLSGFCFHEGDWYLVYEHASNGSLSEWIHTT-KSLLSLTQKLQIALDIATGLNYLHNFA    | 165 |
| L1                                                                       | VRLIGYCVG--SLFLVYVEYVENGNLQHLHGSGREPLPWTKRVQIALDSARGLEYIHEHT    | 179 |
| <div> <div>Vlb</div> <div>VII</div> <div>VIII</div> </div>               |                                                                 |     |
| PKA-Ca                                                                   | ---LIYRDLKPENLL---IDQQGYIQVTDGFAKRVKG---RTWTLCGTPEYLAPEIILS     | 170 |
| CaMK1                                                                    | ---IVHRDLKPENLLYYSLDEDSKIMISDFGLSKMEDPG-SVLSTACGT PGYVAPVFLAQ   | 192 |
| L4                                                                       | DPPYVHRDLN SNNVF---LDLEFRAKIGSLGSARSTTEDFVLTKHVEGTRGYLAPEYLEH   | 222 |
| L1                                                                       | VPVYVHRDIKSANIL---IDQKFRAKVADFGLTKLTEVGGSATRGAMGT FGYPAPETVYG   | 236 |
| <div> <div>IX</div> <div>X</div> </div>                                  |                                                                 |     |
| PKA-Ca                                                                   | KGYNKAVDWWALGVLIYEMAAGYPPFFADQPIQIYEKIVSGKVRFPS----HFSSDLKDL    | 226 |
| CaMK1                                                                    | KPYSKAVDCWSIGVIAIYILLCGYPPFYDENDAKLFEQILKAEYEFDSPYWDIDSDAKDF    | 252 |
| L4                                                                       | GLVSTKLDVYAFGVVLLIEIVTGK-----EASELK-----KEIDEGKA                | 259 |
| L1                                                                       | -EVSADVYAFGVVLYELI SAKGAVVKMTEAVGEFRGLVGVFEE SF-----KETDKEEA    | 290 |
| <div> <div>XI</div> </div>                                               |                                                                 |     |
| PKA-Ca                                                                   | LRNLLQVDLT KRFGNLKNGVN-----DIKNHKWFATTDWIAIYORKVG               | 269 |
| CaMK1                                                                    | IRHLMKDPEKRFTCEQALQHPWIAAGDTALDKNIHQSVSEQIKKNFAKSKWKQAFNATAV    | 312 |
| L4                                                                       | I DEILIH--GRLLPEGLTSFV-----ERLVVDCLKKDHLNRPMDEN                 | 299 |
| L1                                                                       | LRKIIDPRLGDSYPFDSVYKM-----AELGKACTQENAQLRPSMRYI                 | 332 |
| <div> <div>292</div> <div>370</div> <div>318</div> <div>363</div> </div> |                                                                 |     |
| PKA-Ca                                                                   | LPSLSLLKIWGQAKSQGGQPTER-----                                    | 292 |
| CaMK1                                                                    | VRHMRKLQLGTSQEGQGQTASHGELLTPVAGGPAAGCCCRDCCVEPGTELSPTLPHQL      | 370 |
| L4                                                                       | VMSLSKILAAATQNWEESSY-----                                       | 318 |
| L1                                                                       | VVALSTLFSSSTGNWDVGNFQNEIDLVSIMSGR-----                          | 363 |

**Supplemental Fig. S7.** Comparison of the LYK4 kinase domain with other kinases. ClustalW2 was used for the alignment. L1, LYK1; L4, LYK4; CaMK1, Ca<sup>2+</sup>/Calmodulin-dependent protein kinase I (NP\_003647); PKA-Ca, PKA catalytic subunit alpha-form (XP\_002761879).

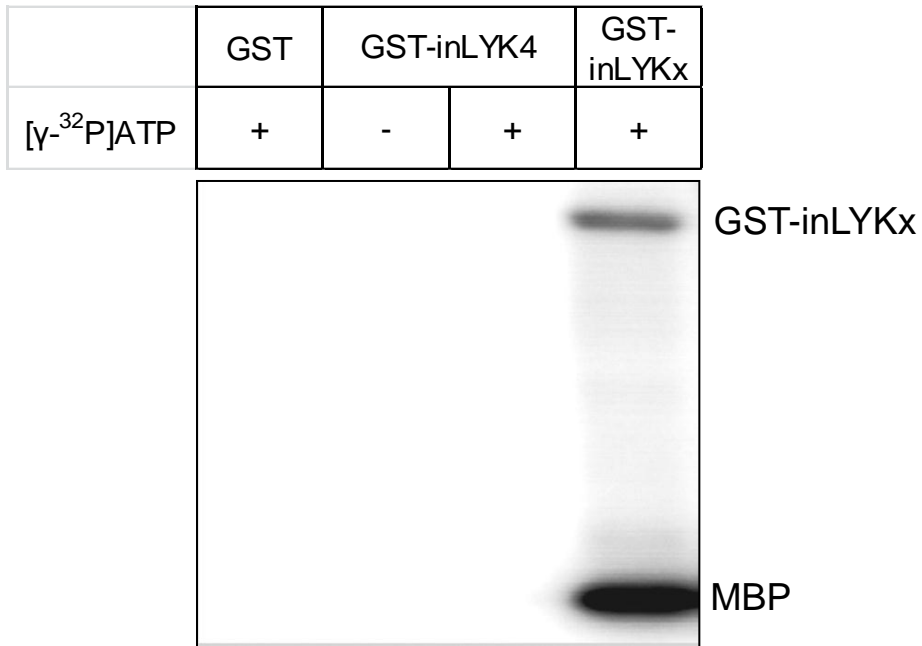

**Supplemental Fig. S8.** Kinase assay of the recombinant LYK4 protein. The intracellular part of LYK4 was expressed as the GST fusion protein, GST-inLyk4. MBP (myelin basic protein) was used as the kinase substrate. LYKx: a LYK protein similar to LYK4.
